# Supplementary material for: A highly specific benzothiazole-based Schiff base for the ratiometric detection of hypochlorite (ClO−) ions in aqueous systems: a real application in biological imaging
Source: Royal Society of Chemistry journal article supplement (doi:10.1039/d4nj01933d), 2024-01-01
Supplement: d4nj01933d1.pdf [file d4nj01933d1.pdf]

## Supporting Information

### **Highly specific benzothiazole based Schiff base for the ratiometric detection of hypochlorite (ClO<sup>-</sup>) ion in aqueous system: a real application in biological imaging**

Aastha Palta<sup>a</sup>, Gulshan Kumar<sup>b</sup>, Sunidhi Sharma<sup>a</sup>, Diptiman Choudhary<sup>a</sup>, Kamaldeep Paul<sup>a</sup>, and Vijay Luxami<sup>a\*</sup>

*<sup>a</sup>Department of Chemistry and Biochemistry, Thapar Institute of Engineering and Technology, Patiala-147004, India*

*<sup>b</sup>Department of Chemistry, Banasthali University, Banasthali Newai 304022, Rajasthan, India*

Email: [vluxami@thapar.edu](mailto:vluxami@thapar.edu)

## Table of Contents:

Figure S1:  $^1\text{H}$  NMR spectrum of probe **1**

Figure S2:  $^{13}\text{C}$  NMR spectrum of probe **1**

Figure S3: Mass spectrum of probe **1**

Figure S4: Interferences study of probe **1**

Figure S5: Absorption spectra of probe **1**, probe **1** +  $\text{ClO}^-$  complex and **1a'**

Figure S6: HRMS spectrum of probe **1** +  $\text{ClO}^-$  complex.

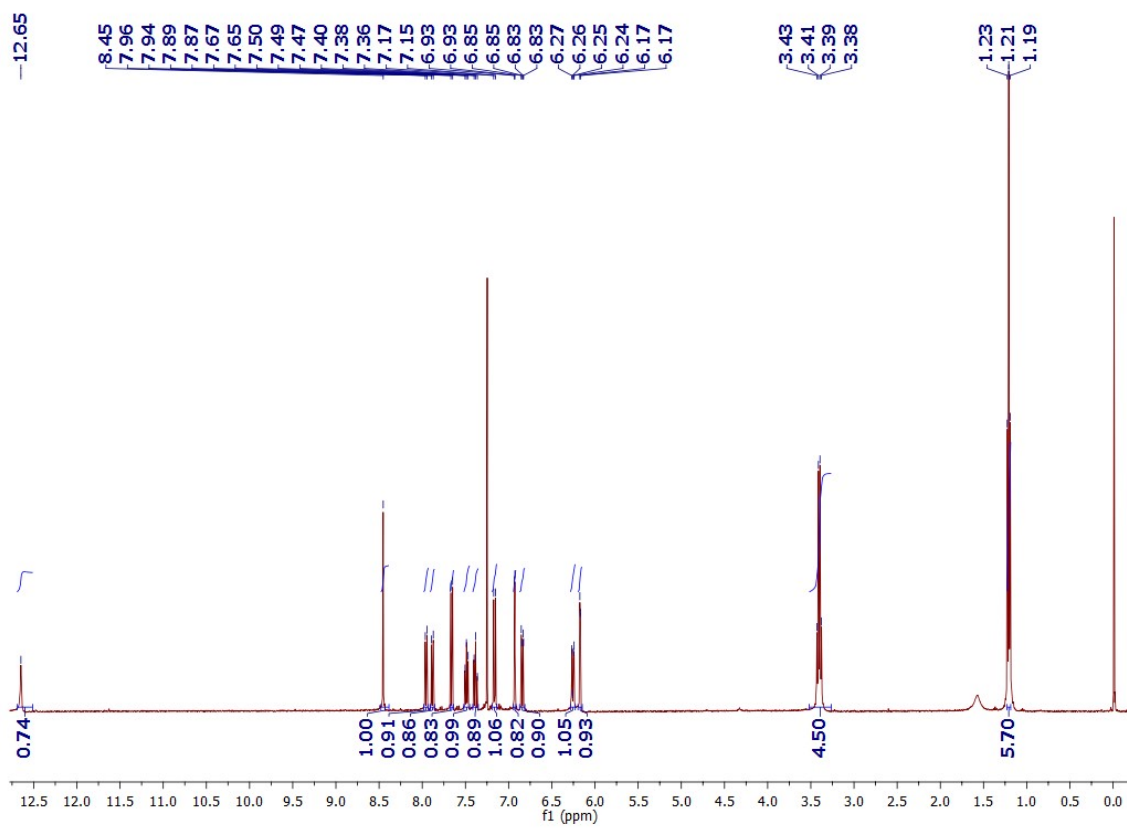

Figure S1: <sup>1</sup>H NMR spectrum of probe 1

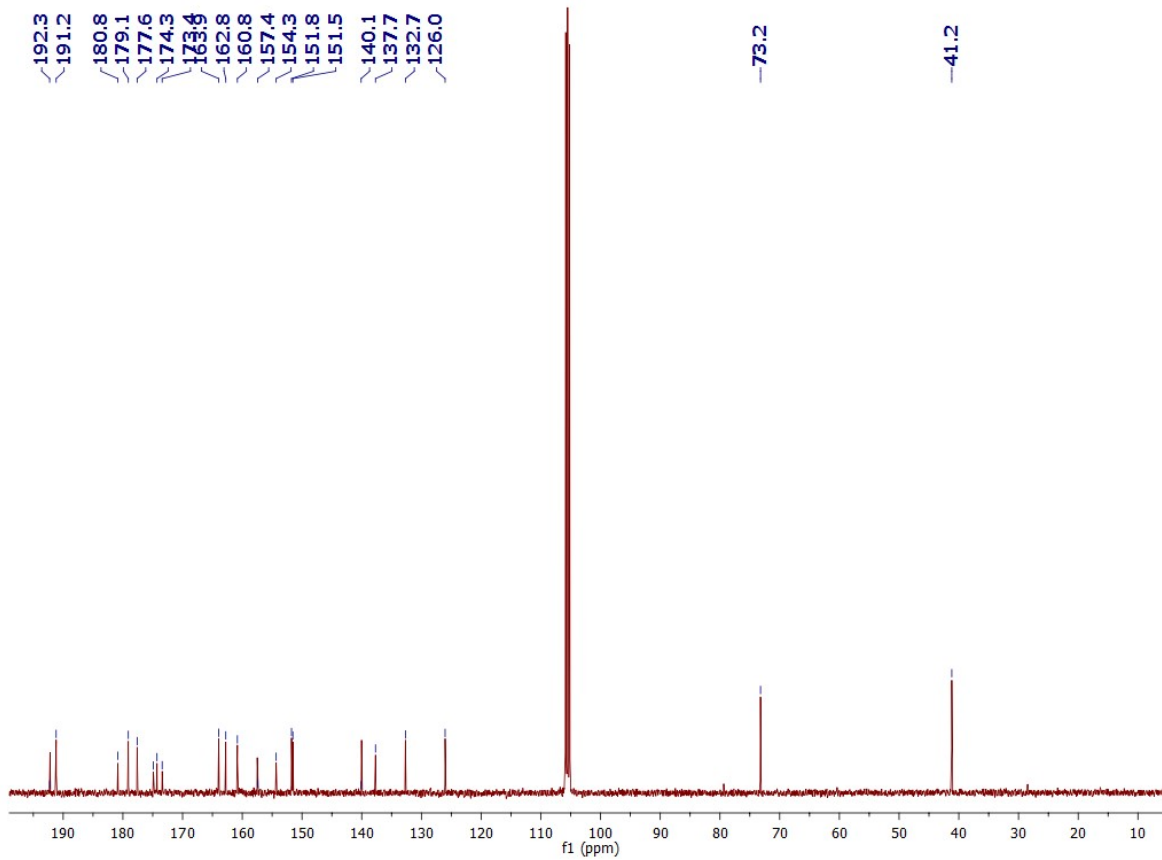

Figure S2:  $^{13}\text{C}$  NMR spectrum of probe 1

Sample Name : AP-30  
Test Name : D MASS-1  
170919-AP-30 7 (0.137) Cm (7:12)

IITRPR

XEVO G2-XS QTOF

2: TOF MS ES+  
7.49e7

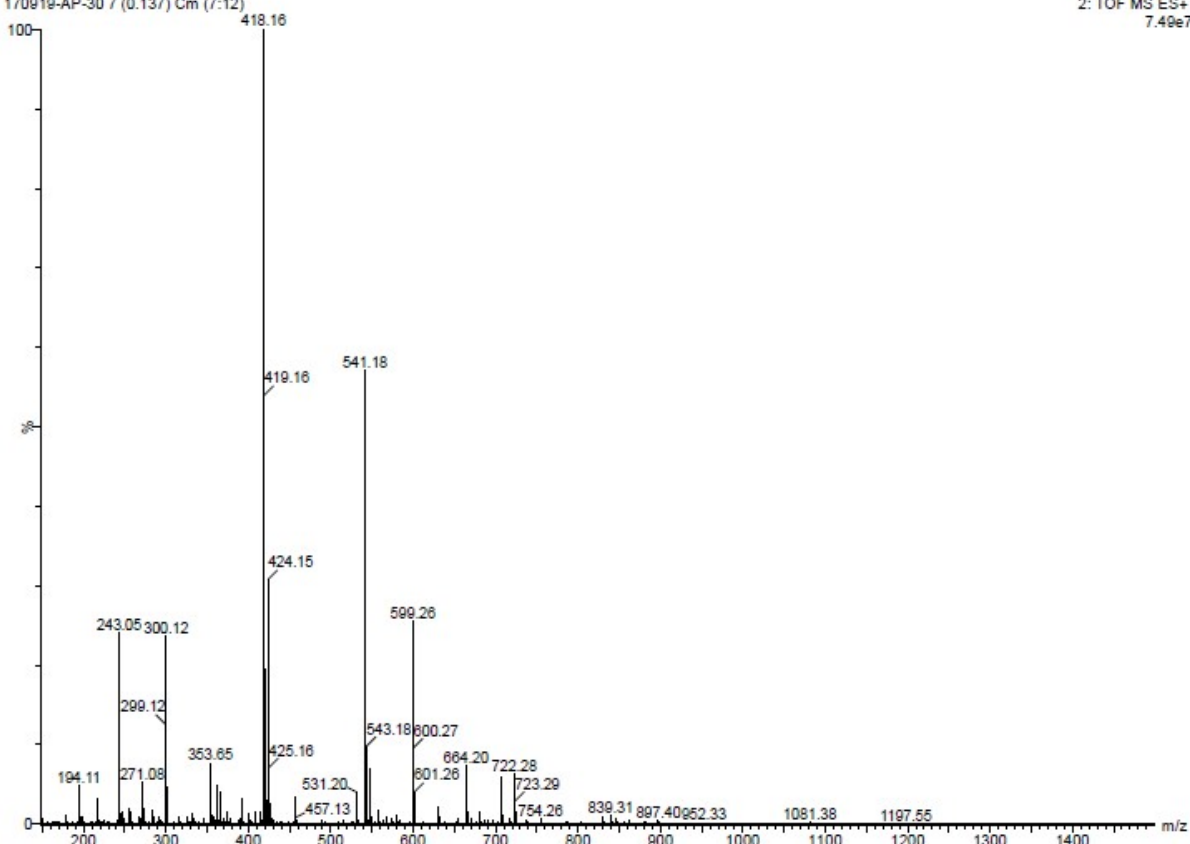

Figure S3: Mass spectrum of probe 1

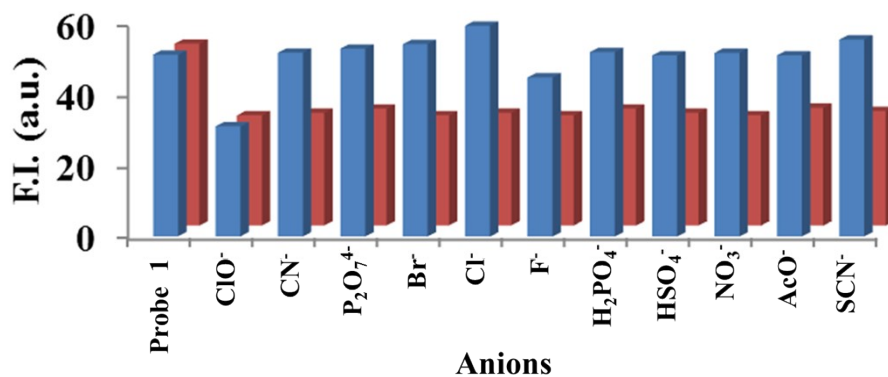

**Figure S4:** Relative emission intensity of probe **1** (20 μM, CH<sub>3</sub>OH: H<sub>2</sub>O (9:1, [v/v], pH=7.04) ( $\lambda_{ex}$ = 435 nm) with different competing anions in the absence and presence of ClO<sup>-</sup> at  $\lambda_{em}$ = 520 nm, where blue bars represent the emission intensity change of probe **1** with different anions (1000 μM) and red bars represent probe **1** + ClO<sup>-</sup> in the presence of different relevant competing anions (1000 μM)

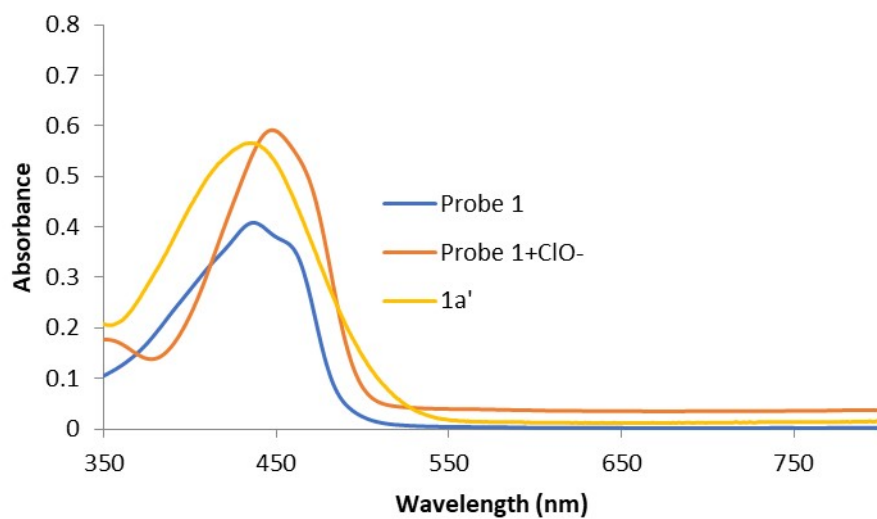

**Figure S5:** Absorption spectra of probe **1**, probe **1** + ClO<sup>-</sup> complex and **1a'**

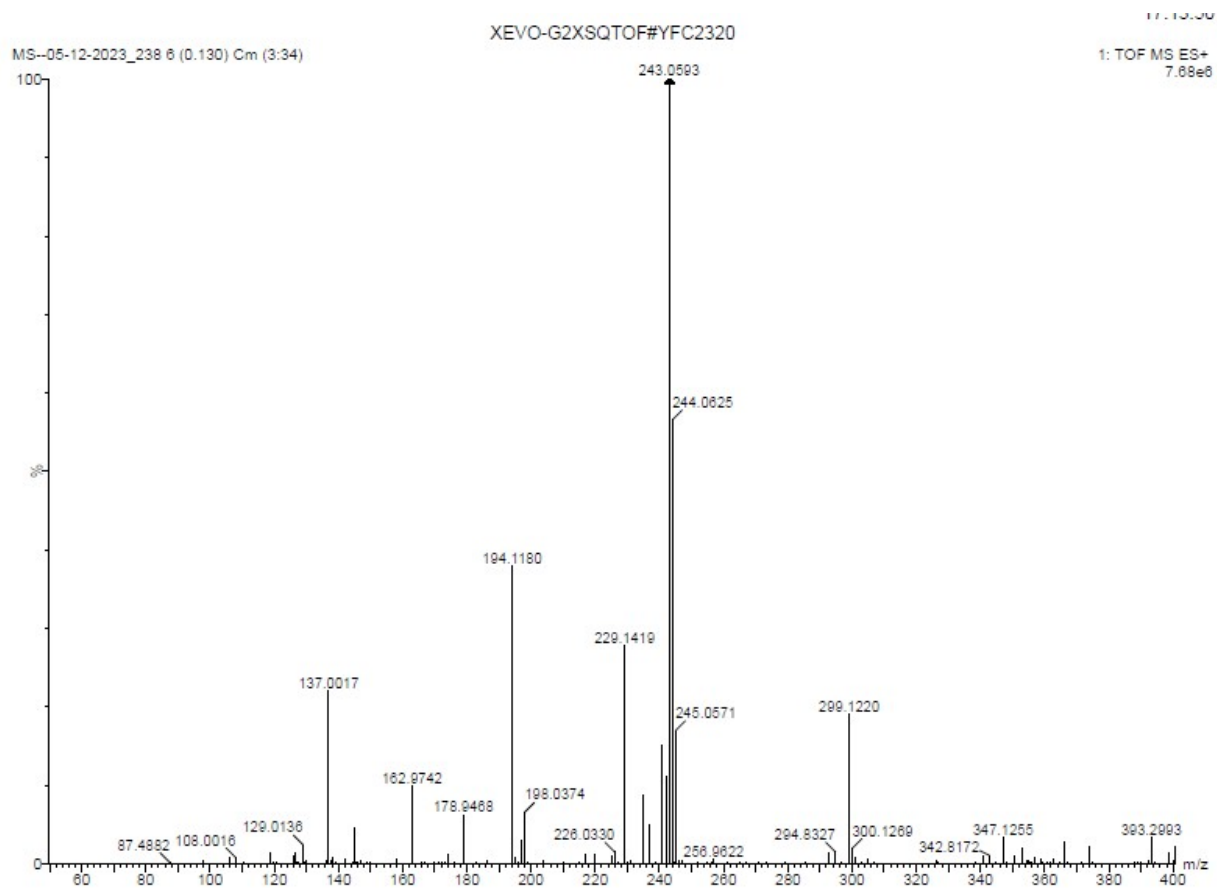

**Figure S6:** HRMS spectrum of probe 1+ClO<sup>-</sup> complex.
